# Supplementary material for: Improvement on the high-rate performance of Mn-doped Na3V2(PO4)3/C as a cathode material for sodium ion batteries
Source: Royal Society of Chemistry journal article supplement (doi:10.1039/c6ra16515j), 2016-01-01
Supplement: c6ra16515j1.pdf [file c6ra16515j1.pdf]

## Supporting Information for

### Improvement on high-rate performance of Mn-doped $\text{Na}_3\text{V}_2(\text{PO}_4)_3/\text{C}$ as cathode materials for sodium ion batteries

Wei Shen, Hui Li, Ziyang Guo, Zhihong Li, Qunjie Xu, Haimei Liu\*, Yonggang Wang\*

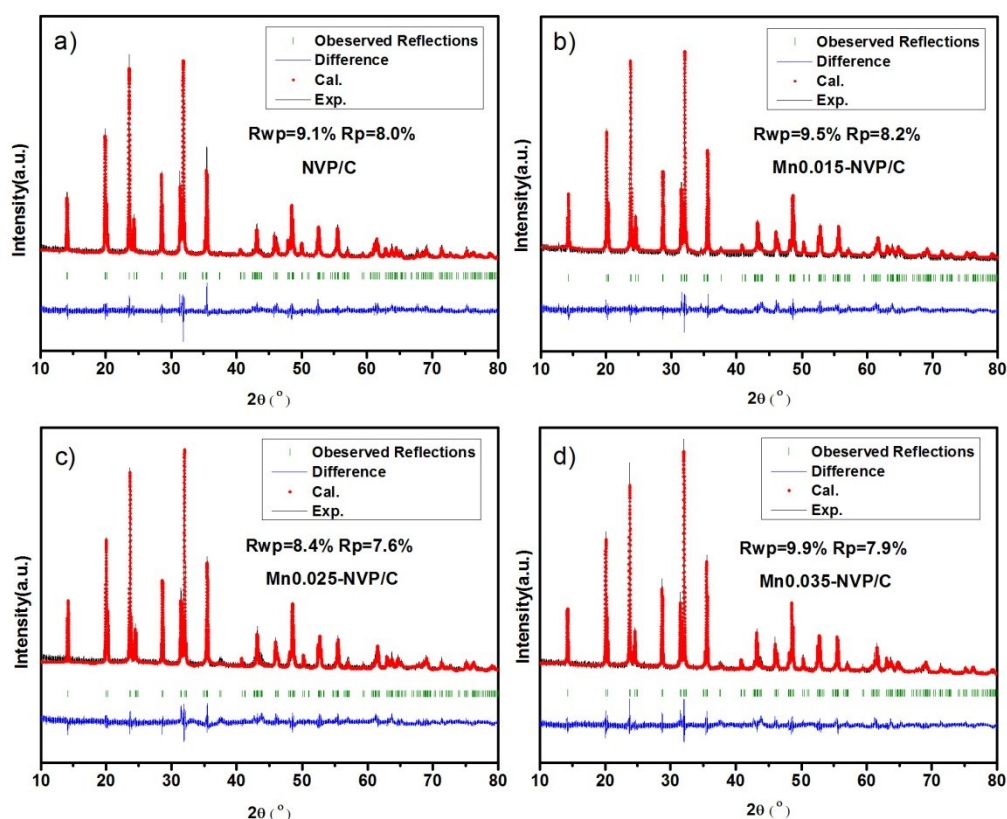

**Fig. S1** Rietveld refined XRD patterns of a) NVP/C, b) Mn0.015-NVP/C, c) Mn0.025-NVP/C and d) Mn0.035-NVP/C.

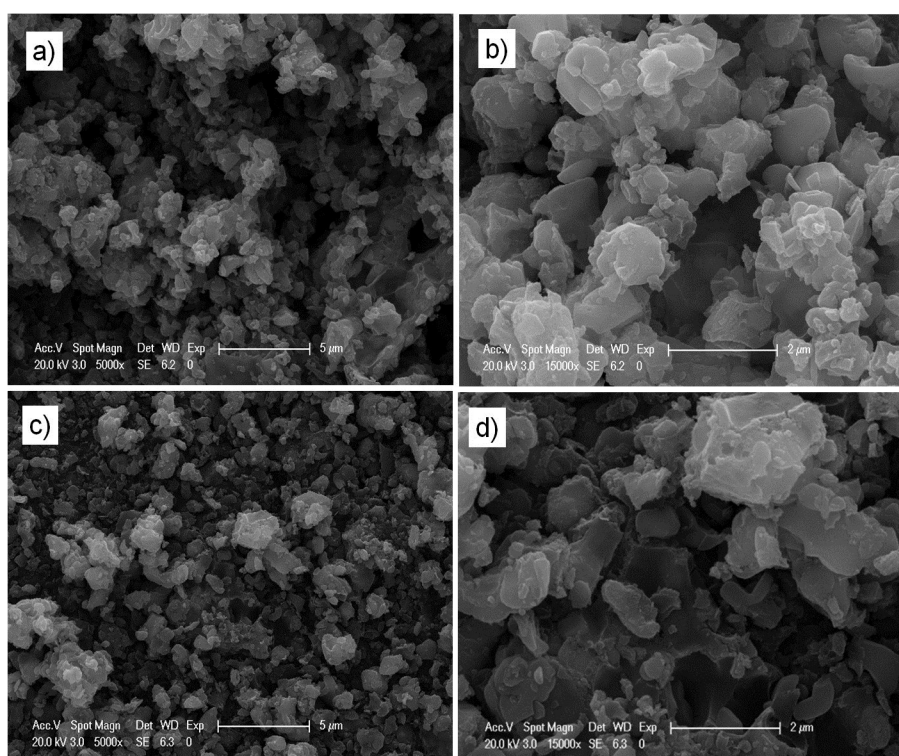

**Fig. S2** SEM images of (a,b) Mn<sub>0.015</sub>-NVP/C and (c,d) Mn<sub>0.035</sub>-NVP/C samples.

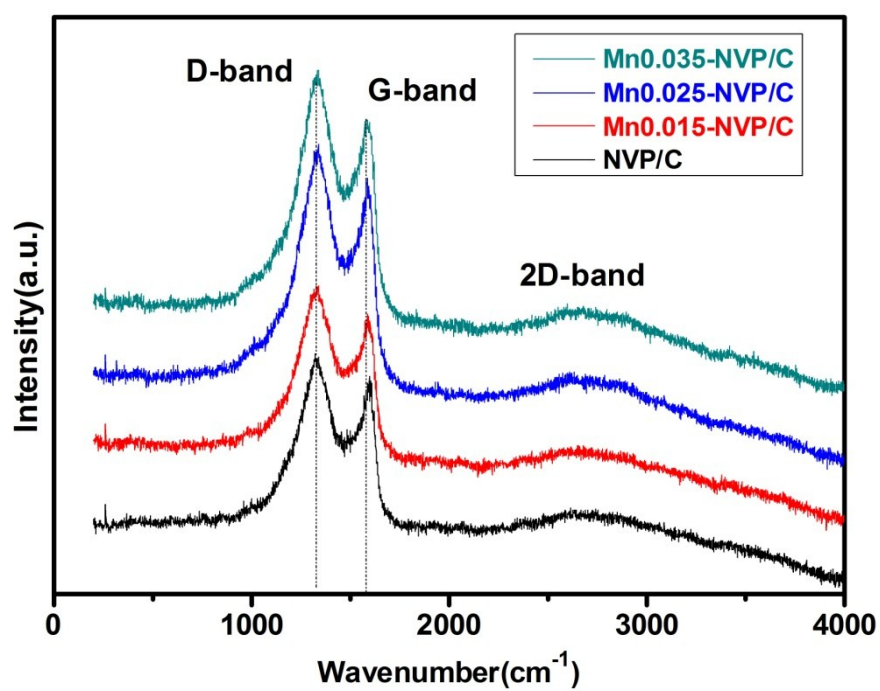

**Fig. S3** Raman spectra of  $\text{Na}_3\text{V}_{2-x}\text{Mn}_x(\text{PO}_4)_3/\text{C}$  ( $x = 0, 0.015, 0.025$  and  $0.035$ ).

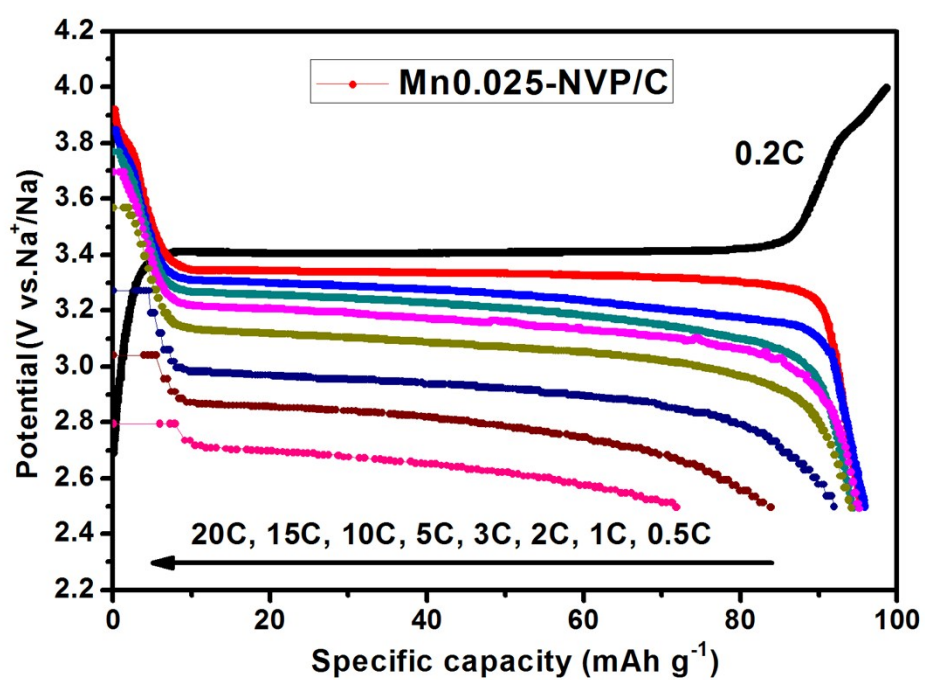

**Fig. S4:** Discharge profiles of Mn<sub>0.025</sub>-NVP/C at various current densities from 0.5 to 20C.

**Table S1:** A comparison of the electrochemical performance of present Mn-doped  $\text{Na}_3\text{V}_2(\text{PO}_4)_3/\text{C}$  with the similar metal-ion doped  $\text{Na}_3\text{V}_2(\text{PO}_4)_3$  electrodes.

| Electrode definition        | Specific capacity<br>(mAh g <sup>-1</sup> ) | Cycle performance            | Reference |
|-----------------------------|---------------------------------------------|------------------------------|-----------|
| Mn <sup>2+</sup> -doped NVP | 95.2 at 2C<br>86.7 at 15C                   | 79.4 after 100 cycles at 15C | This work |
| Mn <sup>3+</sup> -doped NVP | 104 at 0.5C<br>92 at 2C                     |                              | [S1]      |
| Al-doped NVP                | 103 at 0.5C<br>96.8 at 6C                   |                              | [S2]      |
| Mg-doped NVP                | 112.5 at 1C<br>106.4 at 20C                 | 86.2 after 50 cycles at 20C  | [S3]      |

#### References

[S1]: R. Klee, P. Lavela, M. J. Aragon, R. Alcantara, J. L. Tirado, *J. Power Sources*, 2016, **313**, 73.

[S2]: M.J. Aragón, P. Lavela, R. Alcántara, J.L. Tirado, *Electrochimica Acta*, 2015, **180**, 824.

[S3]: H. Li, X. Yu, Y. Bai, F. Wu, C. Wu, L.-Y. Liu, X.-Q. Yang, *J. Mater. Chem. A*, 2015, **3**, 9578.
